# Supplementary material
Source: PubMed Central journal article supplement (PMC7545584)

Fig S4

A.

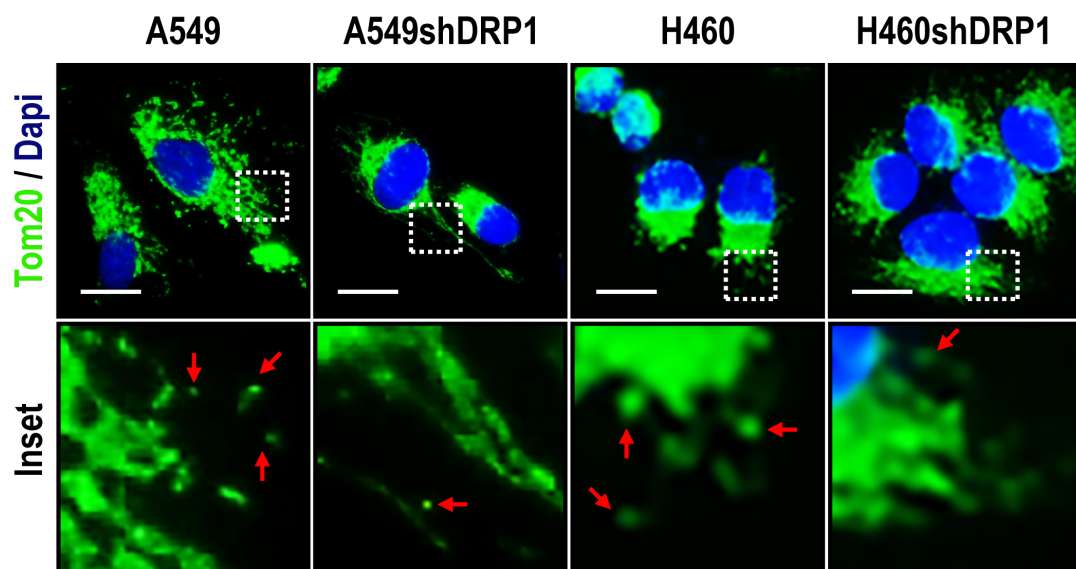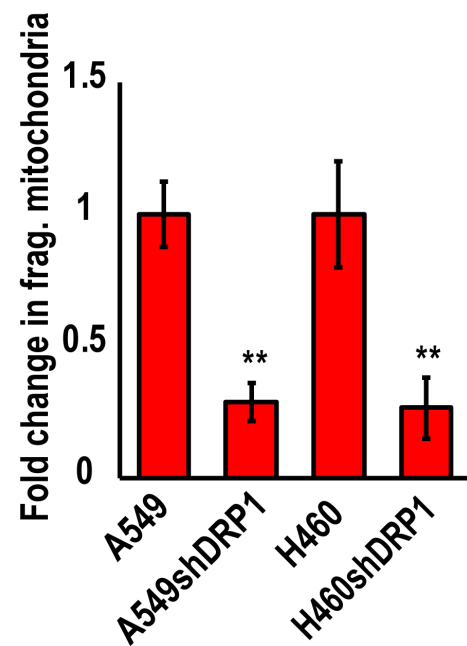

B.

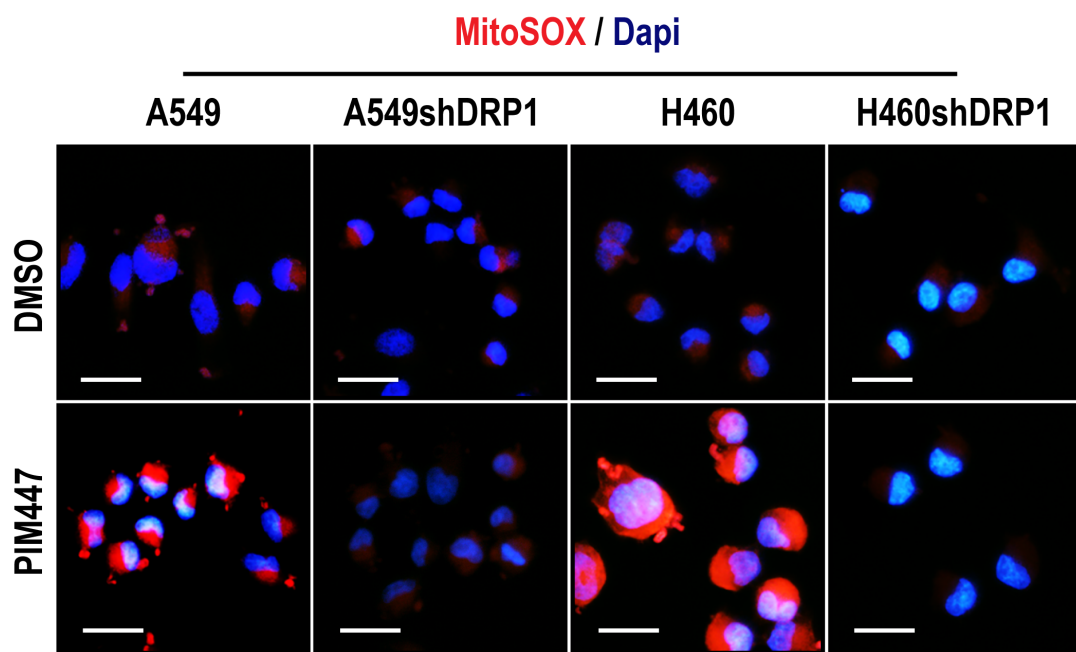

Supplement: NIHMS1625053-supplement-1625053_Supp_Fig4.pdf [file NIHMS1625053-supplement-1625053_Supp_Fig4.pdf]

A.

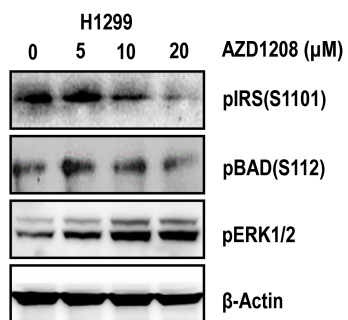

B.

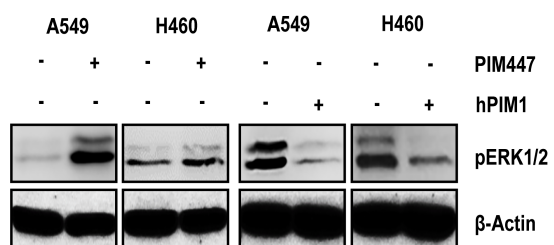

C.

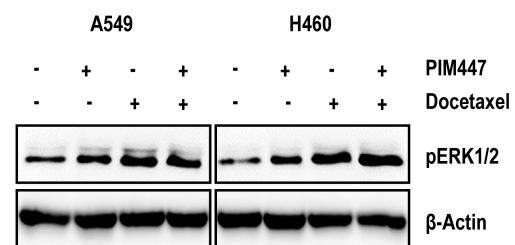

Supplement: NIHMS1625053-supplement-1625053_Supp_Fig6.pdf [file NIHMS1625053-supplement-1625053_Supp_Fig6.pdf]
